# Supplementary material for: Nutritional and Technological Properties of Albino Peach Palm (Bactris gasipaes) from the Amazon: Influence of Cooking and Drying
Source: MDPI journal article supplement (doi:10.3390/foods12234344), 2023-12-01
Supplement: s1 [file s1]

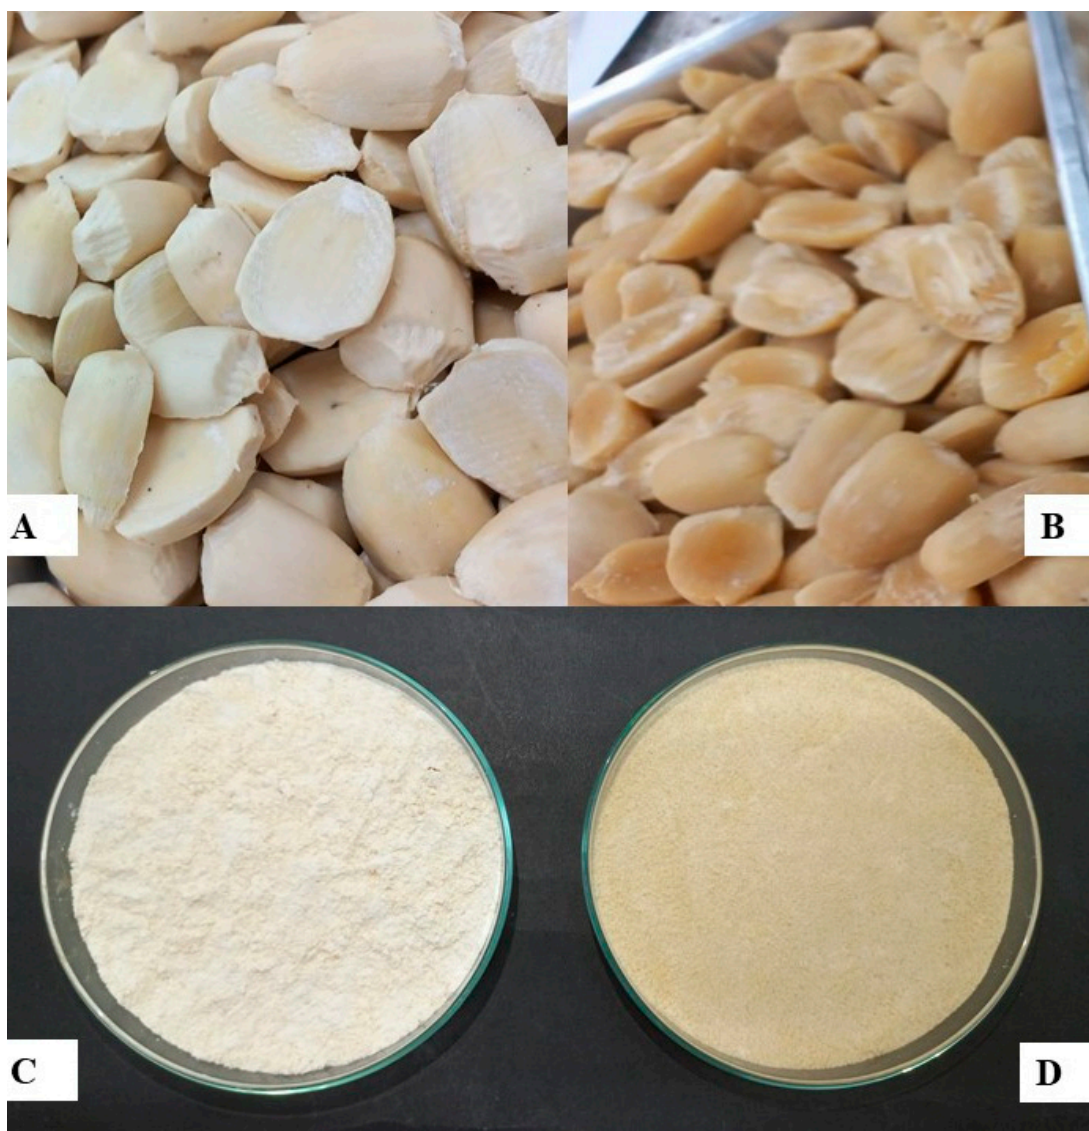

**Figure S1.** Visual appearance of the albino peach palm: (A) raw pulp; (B) cooked pulp; (C) raw pulp flour; (D) cooked pulp flour.
